# Supplementary material
Source: HighWire-hosted journal article supplement (https://lupus.bmj.com/content/9/1/e000704)

Supplemental Figure 1

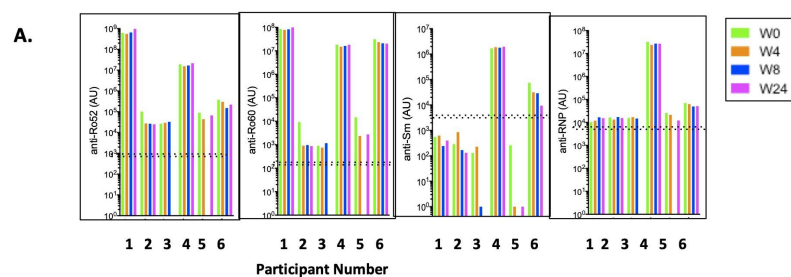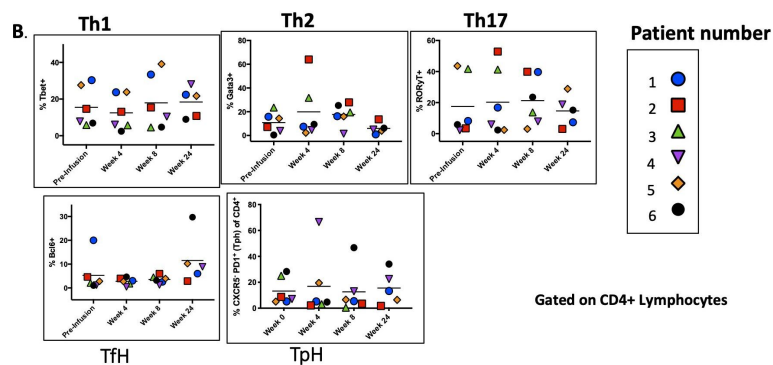

Supplement: inline-supplementary-material-2 [file inline-supplementary-material-2.pdf]
